# Supplementary figures and images for: Perfusion Process Intensification for Lentivirus Production Using a Novel Scale‐Down Model
Source: PubMed Central journal article supplement — Biotechnol Bioeng. 2024 Nov 13;122(2):344–60. doi: 10.1002/bit.28880 (PMC11718438; doi:10.1002/bit.28880), 2024-11-13

**A**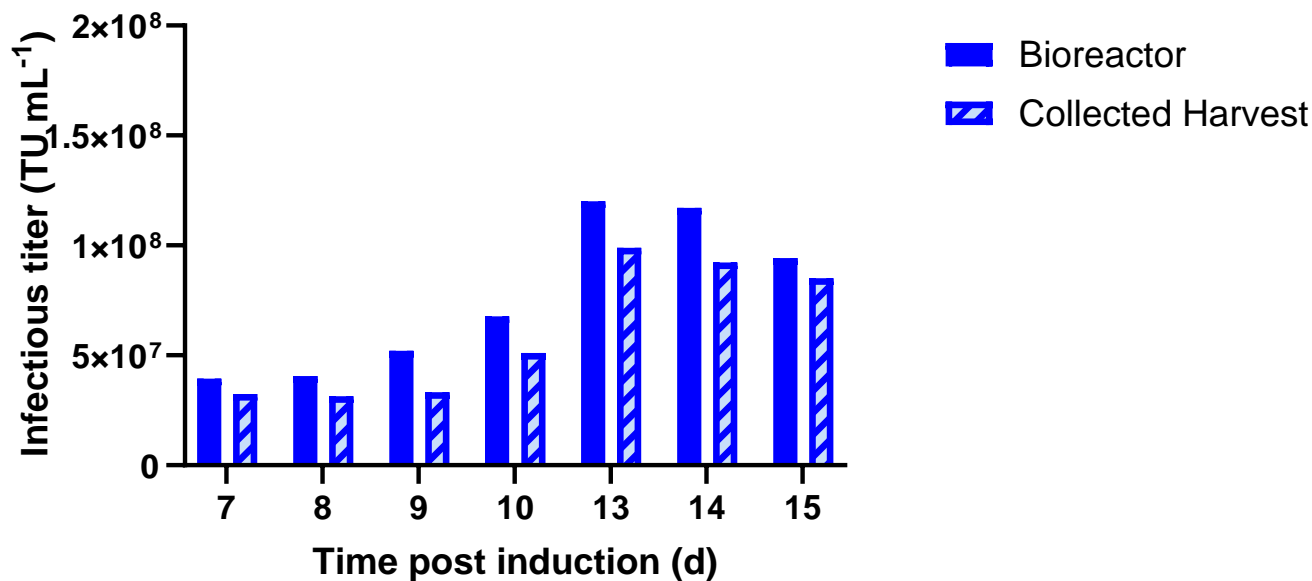**B**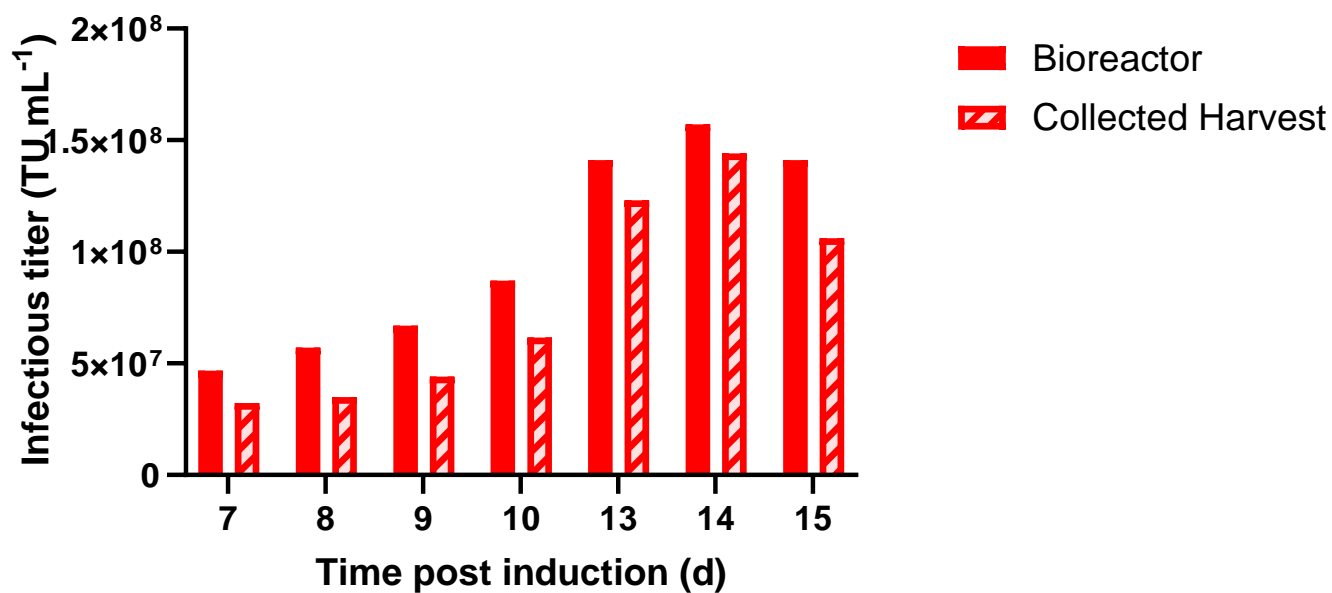

Supplement: BIT-122-344-s001.pdf [file BIT-122-344-s001.pdf]

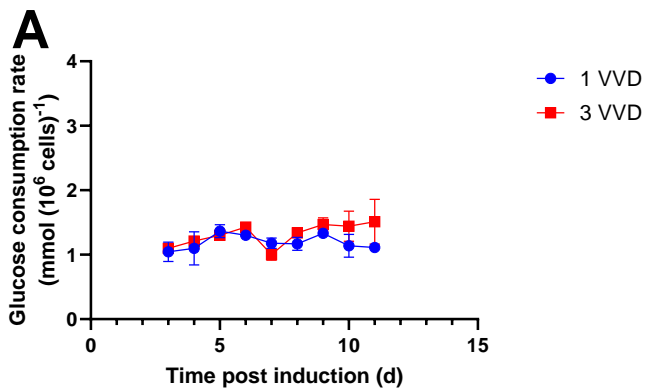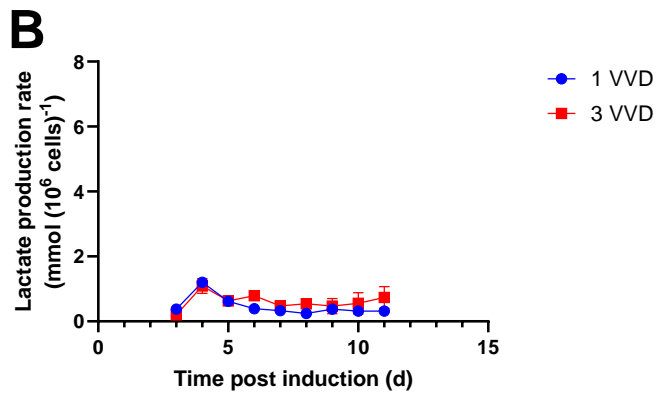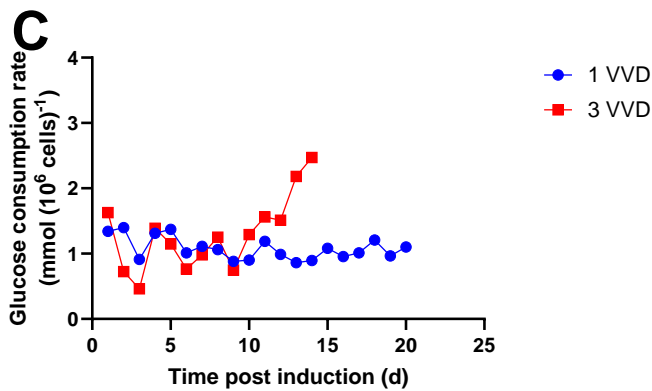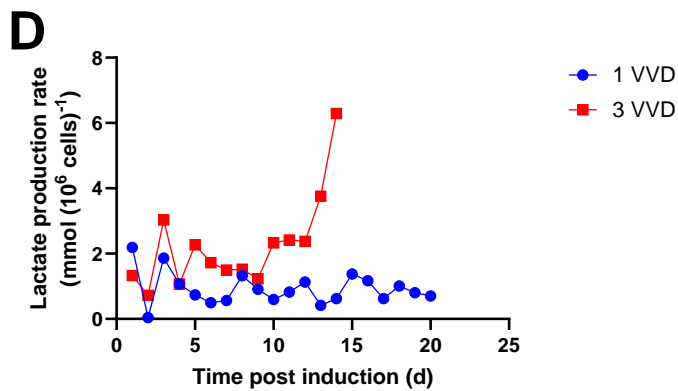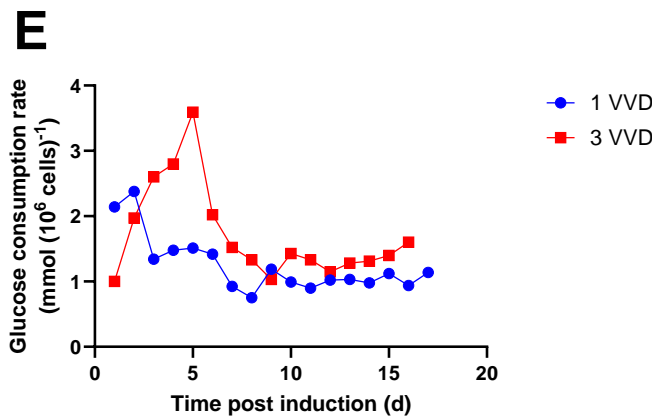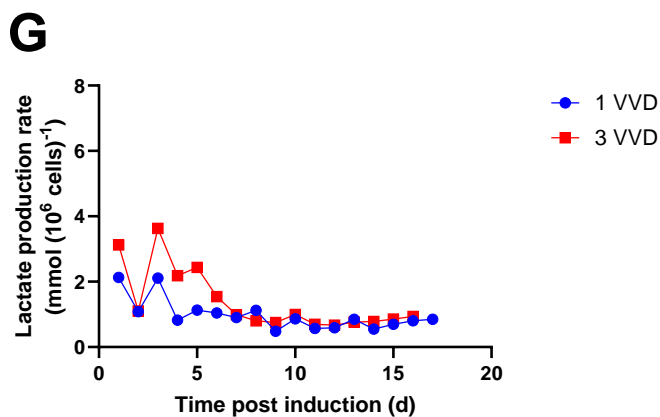

Supplement: BIT-122-344-s002.pdf [file BIT-122-344-s002.pdf]

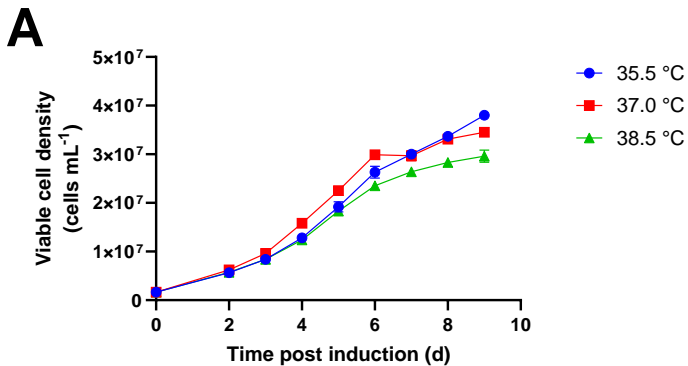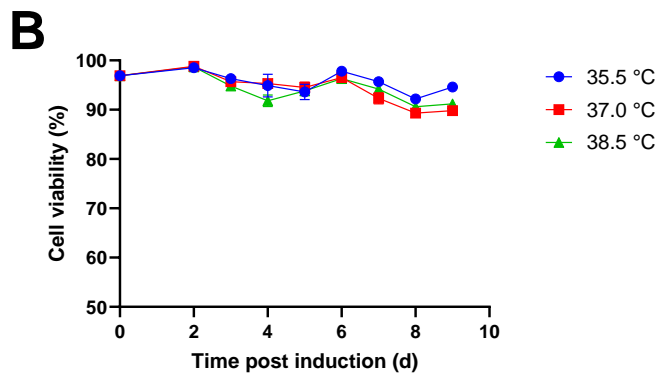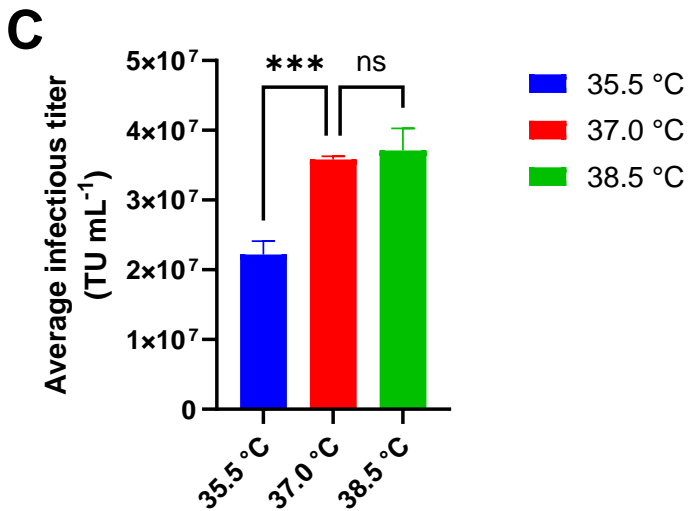

Supplement: BIT-122-344-s004.pdf [file BIT-122-344-s004.pdf]

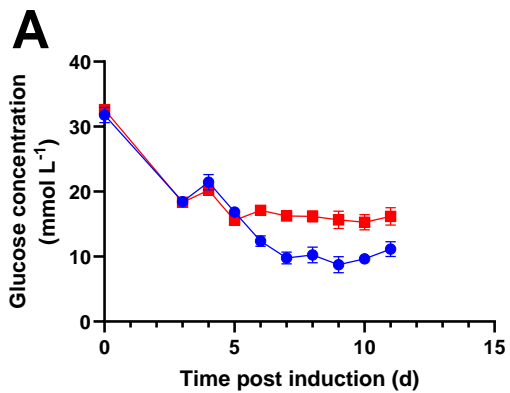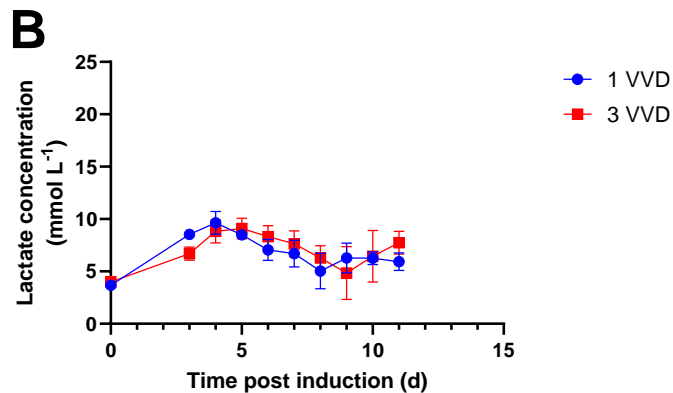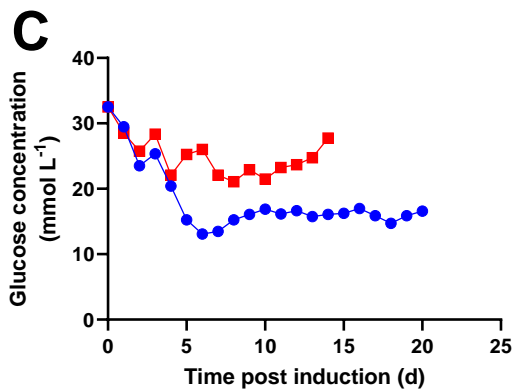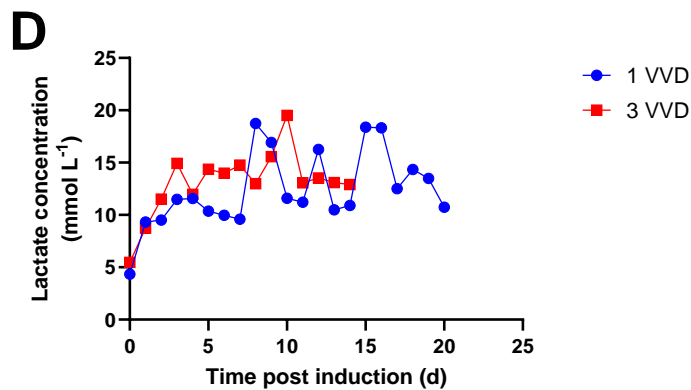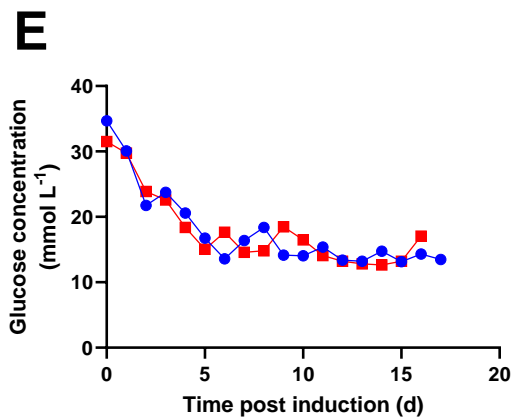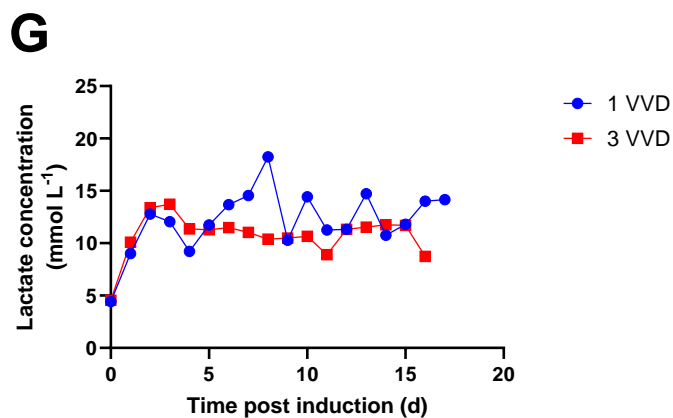

Supplement: BIT-122-344-s005.pdf [file BIT-122-344-s005.pdf]

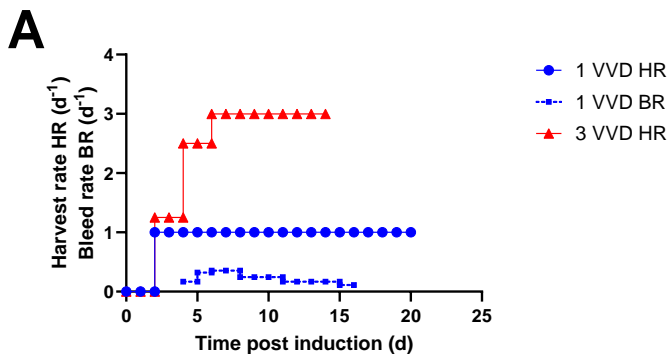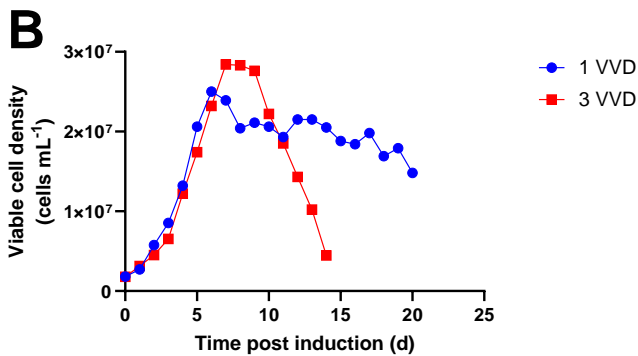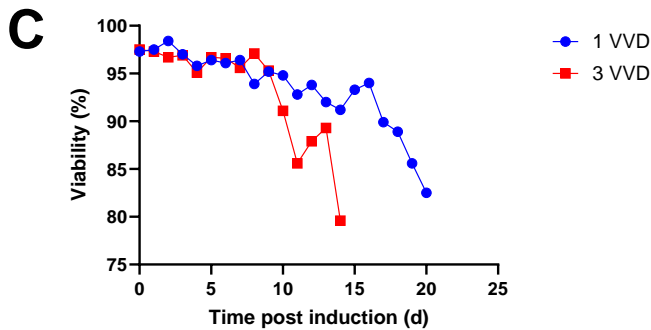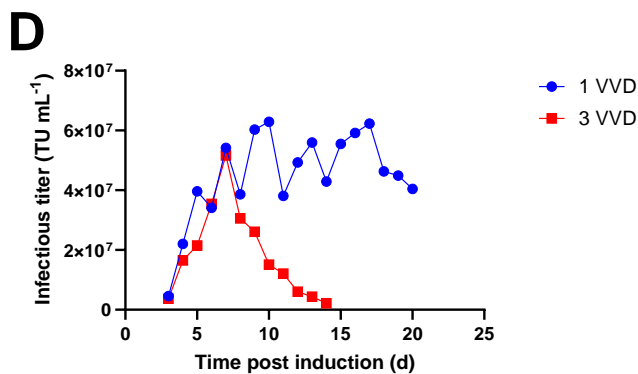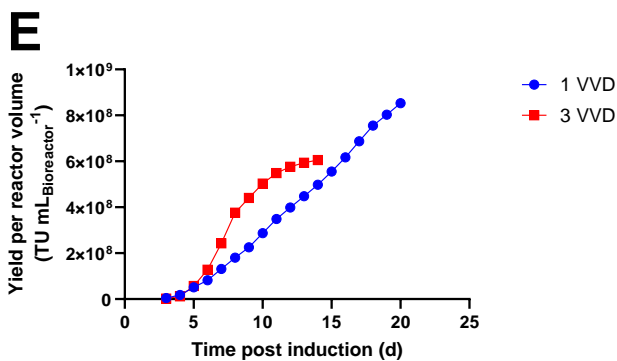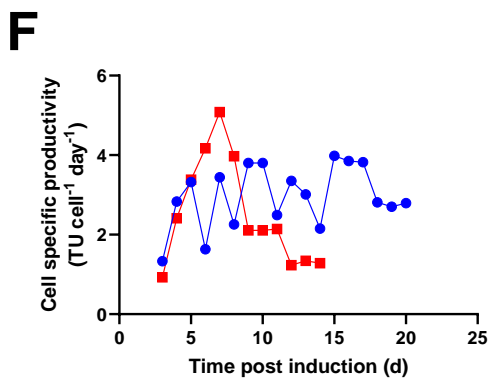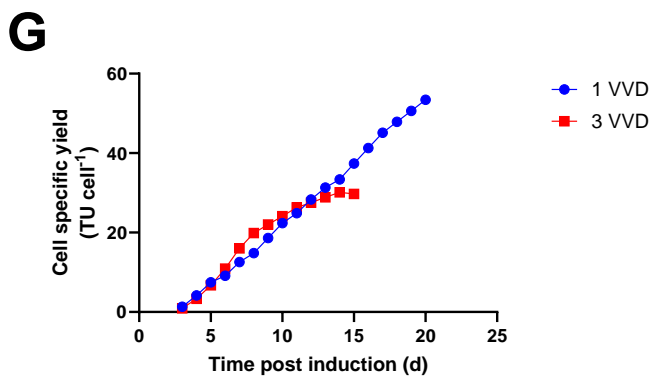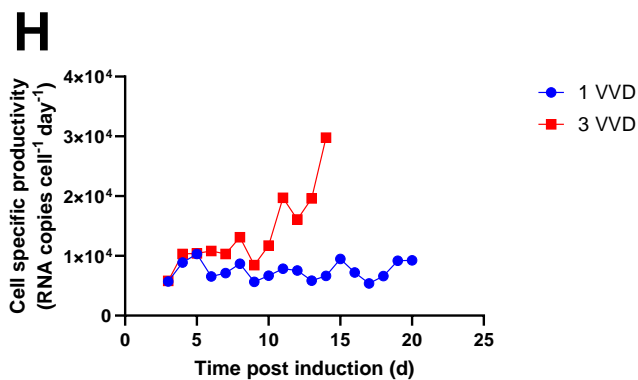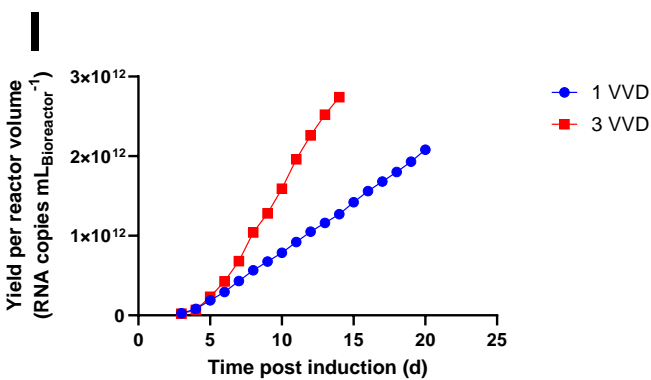

Supplement: BIT-122-344-s006.pdf [file BIT-122-344-s006.pdf]
